# Supplementary material for: Functional improvement assessed by multifocal electroretinogram after Ocriplasmin treatment for vitreomacular traction
Source: BMC Ophthalmol. 2016 Jul 18;16:110. doi: 10.1186/s12886-016-0284-3 (PMC4949888; doi:10.1186/s12886-016-0284-3)
Supplement: Additional file 1: — Multifocal electroretinogram data. (XLSX 14 kb) [file 12886_2016_284_MOESM1_ESM.xlsx]

## Sheet: mfERG data
PATIENT ID	Time-point (Week)	Ring	N1 implicit time (ms)	N1 amplitude (nV/deg^2)	P1 implicit time (ms)	P1 amplitude (nV/deg^2)
1	0	1	23.3	-25	48.1	45
1	0	2	16.9	-6.2	37.5	21.2
1	0	3	22.5	-3.7	37.5	8.7
1	0	4	21.9	-6.2	30	13.7
1	0	5	24.2	-2.5	32.5	6.2
1	0	6	21.4	-3.75	34.167	8.75
1	2	1	25.8	-36.2	29.16	66.2
1	2	2	16.9	-18.7	33.3	47.4
1	2	3	16.1	-17.5	30	38.7
1	2	4	17.5	-12.5	29.2	32.5
1	2	5	17.8	-11.2	28.3	29.9
1	2	6	17.8	-11.2	30	26.2
1	4	1	20	-25	30	67.5
1	4	2	23.6	-6.2	36.1	11.2
1	4	3	21.7	1.2	35.8	5
1	4	4	23.3	-2.5	34.2	8.75
1	4	5	17.5	-5	36.7	10
1	4	6	20.8	-5	35.3	8.75
1	12	1	19.2	-60	32.5	70
1	12	2	15.8	-18.7	25	44.9
1	12	3	13.3	-13.75	25.8	31.25
1	12	4	13.3	-12.5	26.7	28.7
1	12	5	14.2	-11.25	25.8	27.5
1	12	6	15.8	-10	30	23.75
1	24	1	19.7	-28.7	25	89.9
1	24	2	13.3	-18.7	25.8	52.4
1	24	3	14.2	-17.5	27.5	46.2
1	24	4	13.3	-15	26.7	38.7
1	24	5	15.8	-12.5	28.3	35
1	24	6	13.3	-11.2	29.2	28.7
2	0	1	14.6	-17.5	34.2	25
2	0	2	17.5	-33.7	30.6	41.2
2	0	3	18.3	-5	37.2	17.5
2	0	4	13.9	-13.7	29.2	24.9
2	0	5	14.2	-10	36.1	16.2
2	0	6	13.9	-10	31.9	16.25
2	2	1	25.3	-12.5	33.6	50
2	2	2	17.5	-20	34.2	41.25
2	2	3	19.2	-11.25	37.2	17.5
2	2	4	15.8	-6.25	33.9	12.5
2	2	5	13.9	-5	30	11.25
2	2	6	16.7	-5	33.9	11.25
2	4	1	9.7	-15	35	31.25
2	4	2	21.7	-15	28.3	36.25
2	4	3	15.8	-15	30	22.5
2	4	4	16.7	-8.75	30	18.75
2	4	5	18.3	-7.5	30.55	10
2	4	6	18.3	-6.25	31.1	12.5
2	12	1	16.7	-25	28.3	30
2	12	2	13.3	-20	31.7	38.7
2	12	3	10	-10	30	18.75
2	12	4	14.2	-6.25	35	15
2	12	5	12.5	-6.25	28.3	16.25
2	12	6	11.7	-2.5	28.3	7.5
2	24	1	13.6	-40	30.28	76
2	24	2	13.3	-12	30.8	32
2	24	3	14.2	-10	31.7	24
2	24	4	15	-12	26.7	26
2	24	5	10.8	-6	30	14
2	24	6	17.5	-8	32.5	14
3	0	1	18.3	6.25	30.3	11.25
3	0	2	23.3	-6.25	35.8	15
3	0	3	23.6	-7.5	40.8	15
3	0	4	22.2	-6.25	40	11.25
3	0	5	22.2	-5	38.3	11.25
3	0	6	23.6	-3.75	40	8.75
3	2	1	19.167	-8.24	35.833	41.181
3	2	2	23.889	-10	33.333	18.824
3	2	3	22.5	-2.94	33.056	4
3	2	4	22.8	-2.353	33.056	4.118
3	2	5	22.778	-4.118	42.778	5.896
3	2	6	21.667	-2.941	38.611	5.294
3	4	1	25.278	-18.75	33.333	27.5
3	4	2	25.833	-10.625	38.333	7.5
3	4	3	21.944	-7.5	38.889	10.625
3	4	4	22.5	-6.35	36.944	10.1
3	4	5	24.4	-3.75	28.3	6.25
3	4	6	24.167	-2.5	40	6.25
3	12	1	18.3	-41.25	30.833	138.75
3	12	2	12.5	-16.25	29.167	48.75
3	12	3	12.5	-17.5	28.333	43.75
3	12	4	15.833	-11.25	27.5	31.25
3	12	5	10.833	-7.5	28.333	21.25
3	12	6	12.5	-7.5	28.611	20
3	24	1	13.6	-82.5	24.2	135
3	24	2	13.3	-20	25.8	62.5
3	24	3	14.2	-12.5	31.7	37.5
3	24	4	15.8	-10	27.5	30
3	24	5	14.2	-10	26.7	22.5
3	24	6	14.2	-7.5	27.5	22.5
4	0	1	18.3	-48.7	28.3	117.4
4	0	2	15.8	-17.5	30	50
4	0	3	17.2	-8.7	28.3	24.9
4	0	4	14.2	-7.5	26.7	20
4	0	5	16.9	-3.7	27.5	14.9
4	0	6	17.7	-3.7	29.2	12.4
4	2	1	16.667	-57.5	29.167	157.5
4	2	2	15	-28.75	29.167	71.25
4	2	3	13.333	-10	28.333	37.5
4	2	4	14.167	-5	26.667	22.5
4	2	5	11.667	-5	25.833	20
4	2	6	13.333	8.75	26.111	5
4	4	1	10	-95	26.667	196.25
4	4	2	15	-22.5	26.667	65.25
4	4	3	15.833	-12.5	25.833	32.5
4	4	4	10.833	-17.5	24.167	31.25
4	4	5	17.5	-11.25	24.167	27.5
4	4	6	12.222	-7.5	25.8333	22.5
4	12	1	14	-17.5	23.3	176.2
4	12	2	16.1	-42.5	25.8	92.5
4	12	3	14.2	-36.2	28.3	84.9
4	12	4	14.2	-16.25	26.7	61.25
4	12	5	15	-15	25	51.2
4	12	6	13.3	-16.25	25.8	59.95
4	24	1	11.66	-70	22.5	202.5
4	24	2	13.33	-40	28.33	95
4	24	3	11.66	-25	26.66	65
4	24	4	11.66	-17.5	25	52.5
4	24	5	14.16	-17.5	25	50
4	24	6	14.16	-15	25	50
